# Supplementary material for: Tree House Explorer: A Novel Genome Browser for Phylogenomics
Source: PubMed Central journal article supplement — Mol Biol Evol. 2022 Jun 14;39(6):msac130. doi: 10.1093/molbev/msac130 (PMC9246335; doi:10.1093/molbev/msac130), 2022-06-14
Supplement: msac130_supplementary_data.pdf [file msac130_supplementary_data.pdf]

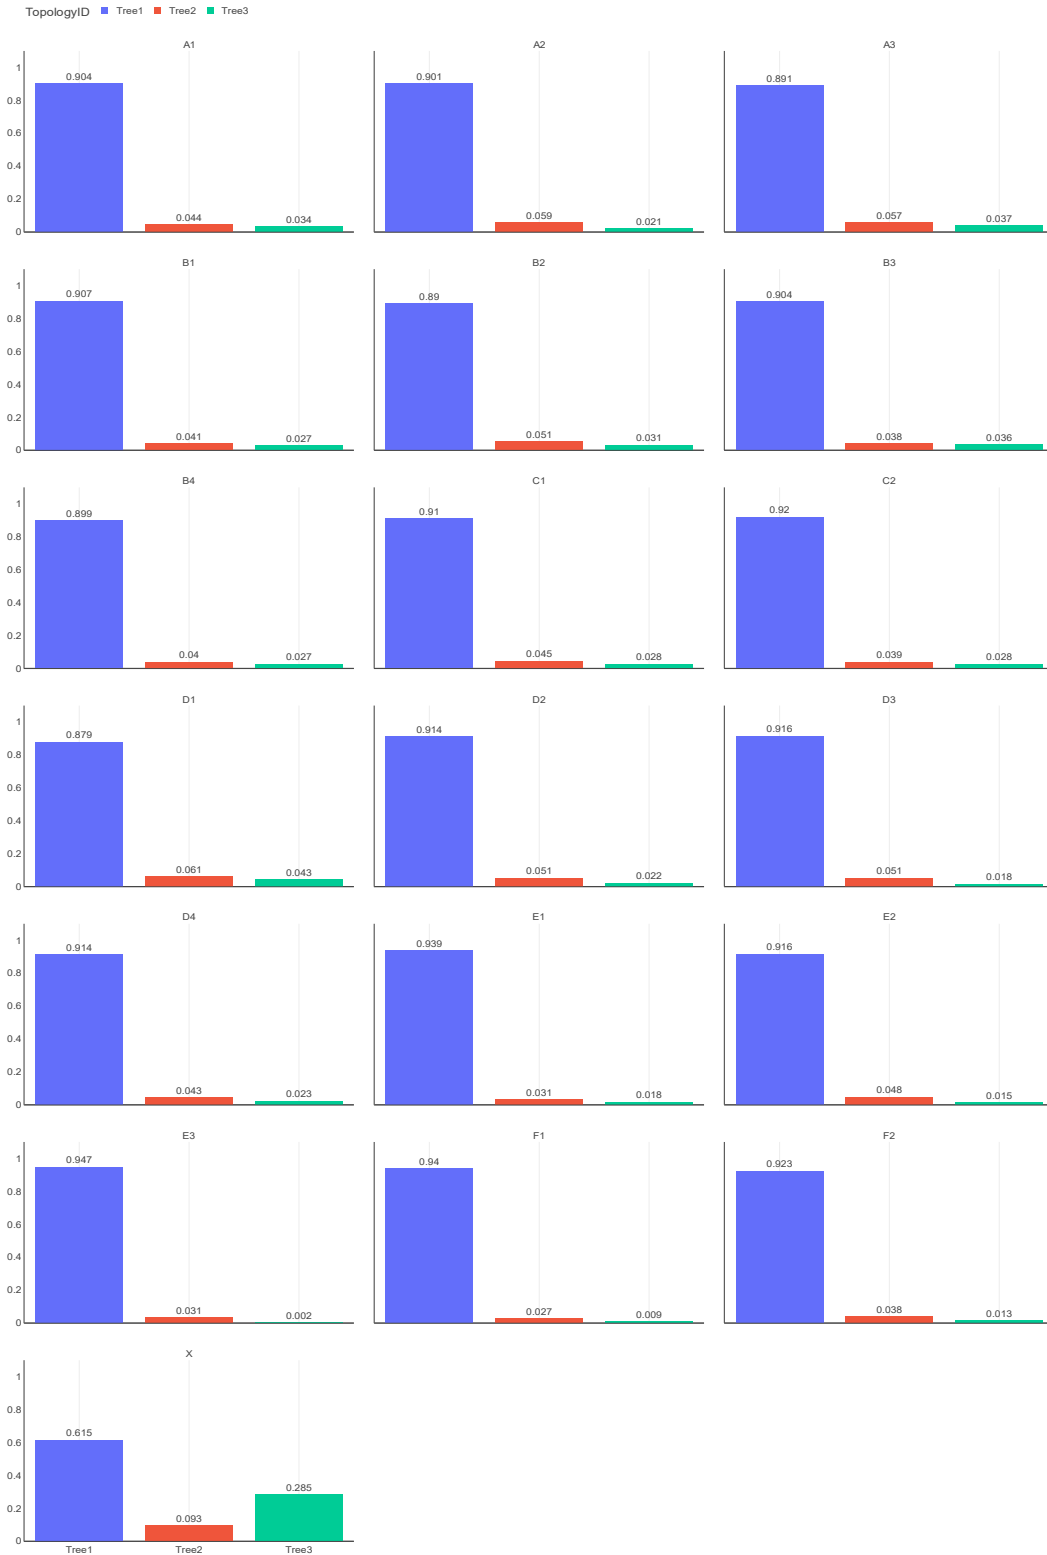

**Supplementary Figure 1:** Whole genome bar plots of topology frequencies per-chromosome for the top three most frequent topologies in the Asian leopard cat data set. Each chromosome is a single bar plot showing frequencies of Tree 1, 2, and 3.

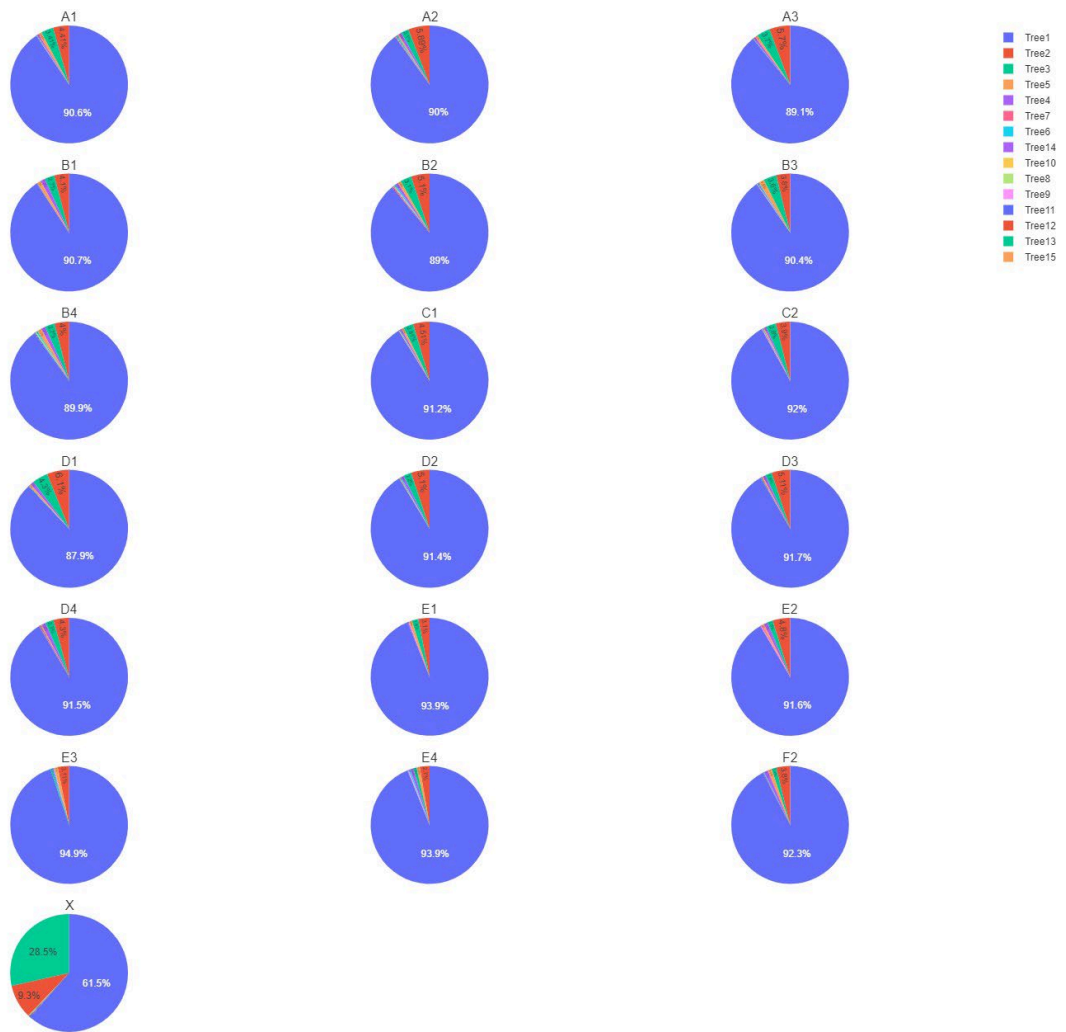

**Supplementary Figure 2:** Whole genome pie charts of topology frequencies per-chromosome from the Asian leopard cat data set.

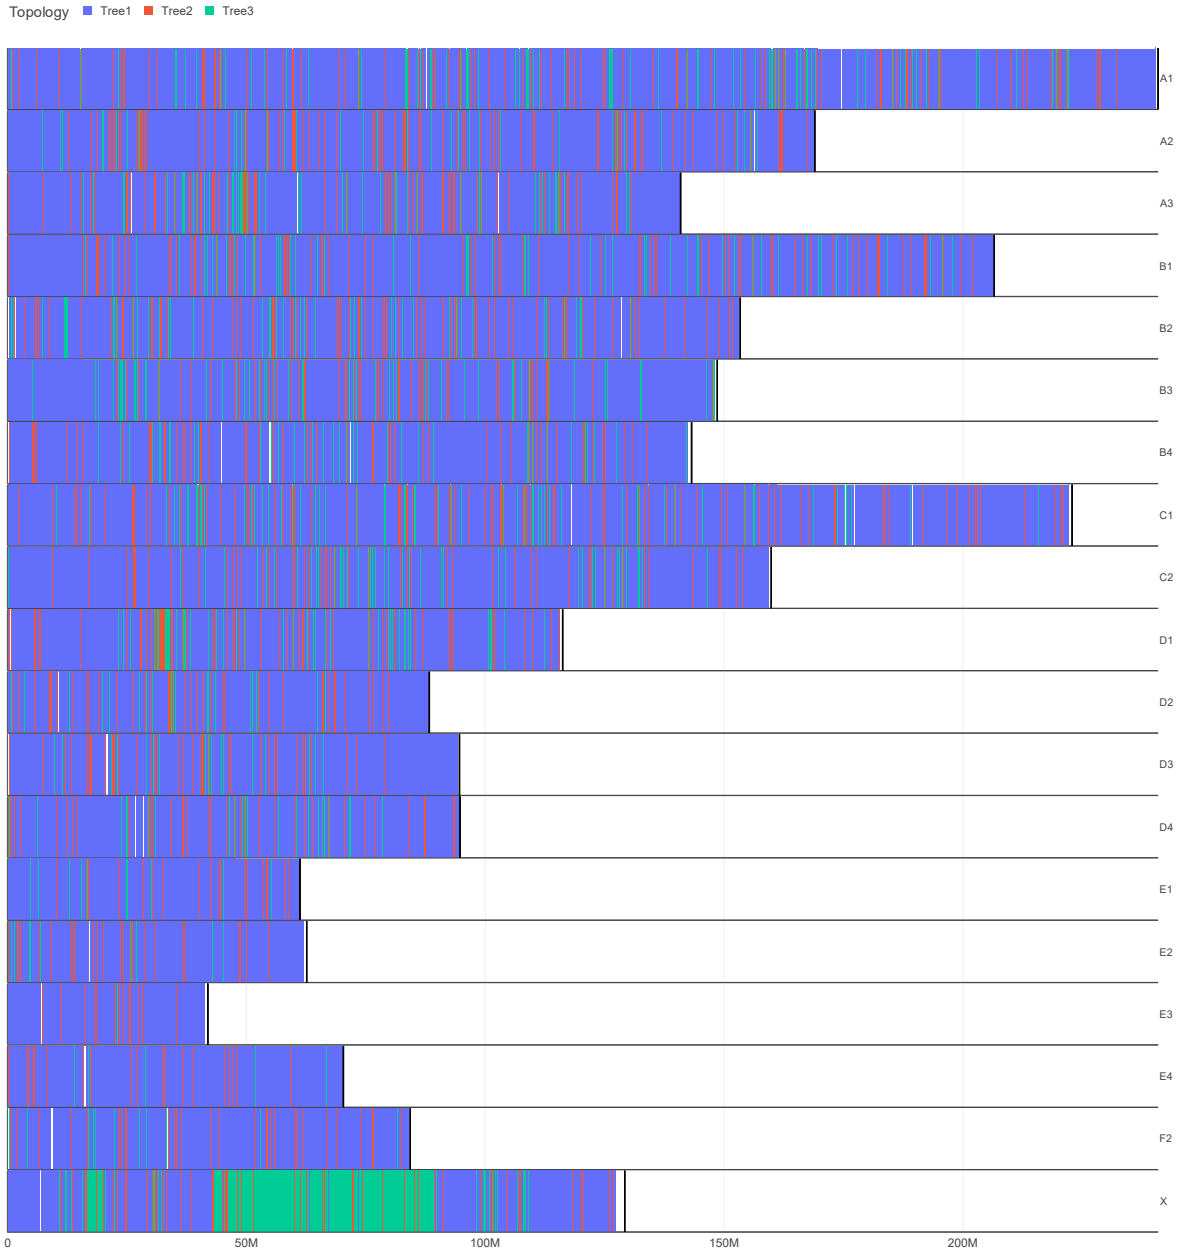

**Supplementary Figure 3:** Whole genome tile plot (1-D histogram) of tree topologies. Each row represents a single chromosome and the distribution of phylogenetic signal along them.

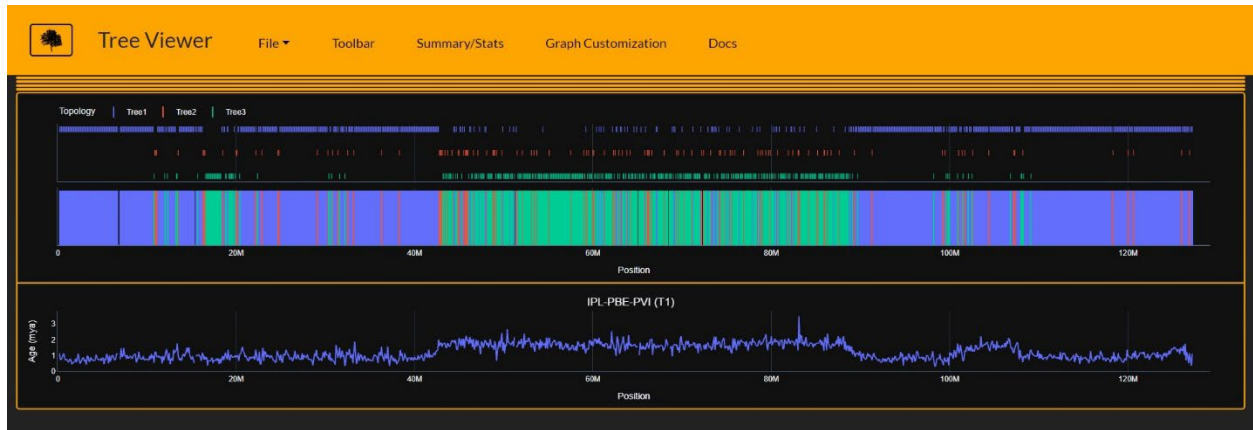

**Supplementary Figure 4:** X chromosome of Asian leopard cat data set showing the divergence time estimates for the node connecting the trio PBE (Asian leopard cat), IPL (Flat-headed cat), and PVI (Fishing cat) as described in Li et al. (2019).

| Chromosome | Window | NewickTree | TopologyID |
|------------|--------|------------|------------|
| chr1       | 1000   | (A,(B,C)); | Tree1      |
| chr2       | 2000   | (B,(A,C)); | Tree2      |
| chr3       | 3000   | (A,(B,C)); | Tree1      |
| chr3       | 4000   | NoTree     |            |

**Supplementary Table 1:** Example Tree Viewer input file with the minimum required columns and data.

| Chromosome | Window | NewickTree | TopologyID | OptionalData1 | OptionalData2 |
|------------|--------|------------|------------|---------------|---------------|
| chr1       | 1000   | (A,(B,C)); | Tree1      | 0.1           | High          |
| chr2       | 2000   | (B,(A,C)); | Tree2      | 0.2           | Low           |
| chr3       | 3000   | (A,(B,C)); | Tree1      | 0.1           | High          |

**Supplementary Table 2:** Example Tree Viewer input file with the minimum required data/columns and two additional data types. Additional data types can be numeric or categorical.

| Chromosome | Window | Sample | Value |
|------------|--------|--------|-------|
| chr1       | 100    | Tiger1 | 0.015 |
| chr1       | 100    | Tiger2 | 0.250 |
| chr2       | 200    | Tiger1 | 0.011 |
| chr2       | 200    | Tiger2 | 0.008 |

**Supplementary Table 3:** Example Signal Tracer input file

| Gene Names - (gene description/alternative ID's) |
|--------------------------------------------------|
| PTPR                                             |
| PMP2                                             |
| FABP9                                            |
| FABP4                                            |
| FABP12                                           |
| LOC101096683 - (olfactory receptor 1A1-like)     |
| LOC101096930 - (olfactory receptor 1A1-like)     |
| LOC101097188 - (olfactory receptor 1A1)          |
| LOC101097434 - (olfactory receptor 1G1)          |
| LOC101082530 - (olfactory receptor 1D2-like)     |
| SLC6A11                                          |
| LOC101082023 - (putative olfactory receptor 3A4) |
| LOC101095695 - (olfactory receptor 3A1-like)     |
| LOC101095929 - (olfactory receptor 3A1)          |
| LOC101082275 - (olfactory receptor 3A2)          |
| LOC101096182 - (olfactory receptor 1D2)          |

|                                                                |
|----------------------------------------------------------------|
| LOC101096427 - (olfactory receptor 1P1-like)                   |
| RETSAT                                                         |
| ELMOD3                                                         |
| CAPG                                                           |
| SH2D6                                                          |
| LOC105260449 - (uncharacterized)                               |
| CFAP97                                                         |
| SNX25                                                          |
| GTPBP4                                                         |
| LOC102901899 - (isopentenyl-diphosphate Delta-isomerase 1)     |
| WDR37                                                          |
| TSLP                                                           |
| WDR36                                                          |
| LOC102899579 - (NKG2-D type II integral membrane protein-like) |
| CNOT4                                                          |
| NUP205                                                         |
| CES1                                                           |
| CES5A                                                          |
| CADPS2                                                         |
| KALRN                                                          |
| LOC101094152 - (membrane cofactor protein)                     |
| LOC105261333 - (discontinued)                                  |
| LOC102899519 - (discontinued)                                  |
| LOC102899461 - (CR1L)                                          |
| CR2                                                            |
| TRIM47                                                         |
| TRIM65                                                         |
| MRPL38                                                         |
| FBF1                                                           |
| ACOX1                                                          |
| TEN1                                                           |
| TCF7L1                                                         |
| LOC101090095 - (discontinued)                                  |
| LOC105260461 - (discontinued)                                  |
| LOC105259637 - (TGOLN2)                                        |
| LOC102899313 - (uncharacterized)                               |
| LOC101092593 - (discontinued)                                  |
| LOC101086711 - (discontinued)                                  |
| LOC105260954 - (discontinued)                                  |
| LOC105260955 - (discontinued)                                  |
| LOC105260946 - (discontinued)                                  |
| WDR36                                                          |
| LCMT1                                                          |
| ARHGAP17                                                       |
| IBSP                                                           |

|                                                                    |
|--------------------------------------------------------------------|
| MAP3K5                                                             |
| LOC105260702 - (immunoglobulin heavy constant delta-like)          |
| LOC101091707 - (Ig mu chain C region membrane-bound form-like)     |
| LOC101086213 - (mesoderm-specific transcript homolog protein-like) |
| LOC102900480 - (olfactory receptor 2T27-like)                      |
| LOC101087376 - (olfactory receptor 2T27-like)                      |
| WEE2                                                               |
| SSBP1                                                              |
| LOC105260397 - (TAS2R3)                                            |
| LOC105260396 - (TAS2R4)                                            |
| LOC105260395 - (TAS2R5)                                            |
| PRSS37                                                             |
| ARSE                                                               |
| ARSH                                                               |
| ARSF                                                               |
| TRPM3                                                              |
| LOC105260699 - (discontinued)                                      |
| LOC101089619 - (discontinued)                                      |
| LOC101093027 - (immunoglobulin heavy variable 3-74-like)           |
| LOC105260698 - (discontinued)                                      |
| LOC105260697 - (discontinued)                                      |
| LOC101093280 - (discontinued)                                      |
| LOC101093946 - (cationic amino acid transporter 3-like)            |
| LOC102901040 - (uncharacterized)                                   |
| LOC101094188 - (cationic amino acid transporter 3-like)            |
| PAPPA2                                                             |
| LOC101086869 - (olfactory receptor 2AJ1-like)                      |
| LOC101087125 - (olfactory receptor 2M5-like)                       |
| LOC101091707 - (Ig mu chain C region membrane-bound form-like)     |
| LOC105260701 - (discontinued)                                      |
| LOC105260700 - (discontinued)                                      |
| LOC101098211 - (discontinued)                                      |
| LOC105260699 - (discontinued)                                      |

**Supplementary Table 4:** felCat8.0 annotated genes within the 42 windows identified to harbor signal of Canada lynx-bobcat hybridization. Information in parentheses beside LOC's are either the update gene symbol or gene description identified on NCBI using the updated gene annotations of the Domestic cat. Discontinued LOC entries were removed from the GO-Enrichment analysis as they likely represent poorly modeled genes in the felCat8.0 gene annotation data set.
